# Supplementary material for: Early exposure to broadly neutralizing antibodies may trigger a dynamical switch from progressive disease to lasting control of SHIV infection
Source: PubMed Central journal article supplement (PMC7462315; doi:10.1371/journal.pcbi.1008064), 2020-08-20
Supplement: pcbi.1008064.s016.pdf [file pcbi.1008064.s016.pdf]

**Table S1** Individual parameter estimates for treated macaques obtained by simultaneously fitting our model (Eqs. 13-20) to  $V$ ,  $A_1$  and  $A_2$  across both untreated macaques and responders (Methods, Figures 2-4). Parameters pertaining to effector depletion experiments with anti-CD8 $\alpha$  and anti-CD8 $\beta$  antibodies were obtained from individual fits (best fits in Figure 2). The units of all the parameters are the same as in Table 2;  $\zeta_\alpha$  and  $\zeta_\beta$  are dimensionless while  $\theta_m$ ,  $\theta_\alpha$ ,  $\theta_\beta$  are in days. (NA - not applicable)

|                 | DEMR                   | MVJ                   | DEWP                  | DEWL                   | MAF                    | DFIK                  | DFKX                  | DFFX                   | DEHW                   | DEBA                   |
|-----------------|------------------------|-----------------------|-----------------------|------------------------|------------------------|-----------------------|-----------------------|------------------------|------------------------|------------------------|
| $V(0)$          | 506.42                 | 0.01                  | 2.35                  | 969.05                 | 665.59                 | 0.12                  | 205.86                | 0.16                   | 1311.13                | 11.48                  |
| $\omega_1$      | 2.23                   | 2.59                  | 2.07                  | 2.66                   | 2.27                   | 2.09                  | 1.73                  | 2.10                   | 2.49                   | 2.49                   |
| $\omega_2$      | 1.00                   | 1.09                  | 1.02                  | 1.20                   | 1.06                   | 1.24                  | 1.10                  | 1.22                   | 1.06                   | 0.98                   |
| $\eta_1$        | 0.26                   | 0.11                  | 0.04                  | 0.09                   | 0.06                   | 0.13                  | 0.07                  | 0.08                   | 0.06                   | 0.06                   |
| $\eta_2$        | 0.23                   | 0.28                  | 0.04                  | 0.09                   | 0.07                   | 0.07                  | 0.12                  | 0.20                   | 0.07                   | 0.05                   |
| $Vol_1$         | 74.90                  | 138.86                | 336.77                | 1187.04                | 1864.01                | 52.46                 | 521.95                | 260.89                 | 433.74                 | 262.41                 |
| $Vol_2$         | 539.42                 | 695.70                | 1271.71               | 347.62                 | 464.55                 | 695.10                | 1292.10               | 433.17                 | 972.15                 | 1671.88                |
| $k_1$           | 3.66                   | 97.42                 | 80.20                 | 2.63                   | 139.42                 | 58.99                 | 55.13                 | 70.54                  | 91.09                  | 433.80                 |
| $k_2$           | 694.24                 | 2509.54               | 46.01                 | 202.07                 | 66.98                  | 5.28                  | 1494.26               | 1096.20                | 344.08                 | 41.67                  |
| $K$             | 59.19                  | 148.67                | 144.49                | 308.05                 | 141.89                 | 146.72                | 32.49                 | 69.74                  | 77.64                  | 35.08                  |
| $\beta$         | $1.07 \times 10^{-8}$  | $1.04 \times 10^{-8}$ | $1.08 \times 10^{-8}$ | $1.15 \times 10^{-8}$  | $1.02 \times 10^{-8}$  | $1.05 \times 10^{-8}$ | $1.15 \times 10^{-8}$ | $9.64 \times 10^{-9}$  | $1.01 \times 10^{-8}$  | $9.85 \times 10^{-9}$  |
| $p^*$           | $4.95 \times 10^9$     | $7.15 \times 10^9$    | $6.92 \times 10^9$    | $6.39 \times 10^9$     | $6.61 \times 10^9$     | $5.95 \times 10^9$    | $5.53 \times 10^9$    | $5.76 \times 10^9$     | $6.41 \times 10^9$     | $7.62 \times 10^9$     |
| $m^*$           | 10.58                  | 10.09                 | 10.48                 | 11.13                  | 12.08                  | 10.90                 | 11.45                 | 10.07                  | 10.34                  | 11.28                  |
| $d_E$           | $8.36 \times 10^{-3}$  | $6.47 \times 10^{-3}$ | $1.24 \times 10^{-2}$ | $1.48 \times 10^{-2}$  | $5.29 \times 10^{-3}$  | $6.73 \times 10^{-3}$ | $1.22 \times 10^{-2}$ | $1.26 \times 10^{-2}$  | $1.23 \times 10^{-2}$  | $2.03 \times 10^{-2}$  |
| $\phi^*$        | $5.02 \times 10^{-5}$  | $2.31 \times 10^{-5}$ | $4.15 \times 10^{-6}$ | $5.45 \times 10^{-5}$  | $4.55 \times 10^{-5}$  | $1.46 \times 10^{-6}$ | $1.18 \times 10^{-4}$ | $4.52 \times 10^{-5}$  | $9.09 \times 10^{-5}$  | $8.84 \times 10^{-5}$  |
| $\xi$           | 0.17                   | 0.21                  | 0.40                  | 0.22                   | 0.20                   | 0.24                  | 0.21                  | 0.21                   | 0.21                   | 0.25                   |
| $f^*$           | $3.36 \times 10^{-11}$ | $5.49 \times 10^{-8}$ | $5.08 \times 10^{-9}$ | $7.01 \times 10^{-11}$ | $5.45 \times 10^{-10}$ | $2.91 \times 10^{-9}$ | $1.82 \times 10^{-9}$ | $9.69 \times 10^{-10}$ | $3.07 \times 10^{-10}$ | $1.37 \times 10^{-10}$ |
| $\zeta_\alpha$  | 0.33                   | 0.84                  | 0.99                  | 0.40                   | 0.35                   | 0.90                  | NA                    | NA                     | NA                     | NA                     |
| $\zeta_\beta$   | 0.56                   | 0.39                  | NA                    | 0.46                   | NA                     | NA                    | NA                    | NA                     | NA                     | NA                     |
| $\theta_m$      | 11.86                  | 10.68                 | 18.17                 | 5.33                   | 4.73                   | 3.53                  | NA                    | NA                     | NA                     | NA                     |
| $\theta_\alpha$ | 607.26                 | 436.54                | 431.86                | 918.09                 | 916.21                 | 333.23                | NA                    | NA                     | NA                     | NA                     |
| $\theta_\beta$  | 942.50                 | 939.18                | NA                    | 1072.86                | NA                     | NA                    | NA                    | NA                     | NA                     | NA                     |
