# Supplementary material for: Early exposure to broadly neutralizing antibodies may trigger a dynamical switch from progressive disease to lasting control of SHIV infection
Source: PubMed Central journal article supplement (PMC7462315; doi:10.1371/journal.pcbi.1008064), 2020-08-20
Supplement: pcbi.1008064.s017.pdf [file pcbi.1008064.s017.pdf]

**Table S2** Individual parameter estimates for the ten untreated macaques obtained by simultaneously fitting our model (Eqs. 13-20) to  $V$ ,  $A_1$  and  $A_2$  across both untreated macaques and responders (Methods and Figure 4).

| Macaque  | UT1                   | UT2                   | UT3                   | UT4                   | UT5                   | UT6                   | UT7                   | UT8                   | UT9                   | UT10                  |
|----------|-----------------------|-----------------------|-----------------------|-----------------------|-----------------------|-----------------------|-----------------------|-----------------------|-----------------------|-----------------------|
| $V(0)$   | 52.27                 | 51.93                 | 17.58                 | 3.67                  | 3.22                  | 15.05                 | 1076.07               | 393.87                | 243.44                | 681.12                |
| $\beta$  | $1.06 \times 10^{-8}$ | $1.13 \times 10^{-8}$ | $1.06 \times 10^{-8}$ | $9.61 \times 10^{-9}$ | $9.68 \times 10^{-9}$ | $1.22 \times 10^{-8}$ | $9.74 \times 10^{-9}$ | $1.11 \times 10^{-8}$ | $1.17 \times 10^{-8}$ | $8.86 \times 10^{-9}$ |
| $p^*$    | $7.83 \times 10^9$    | $6.55 \times 10^9$    | $7.23 \times 10^9$    | $7.85 \times 10^9$    | $7.49 \times 10^9$    | $5.12 \times 10^9$    | $8.56 \times 10^9$    | $7.20 \times 10^9$    | $7.83 \times 10^9$    | $8.07 \times 10^9$    |
| $m^*$    | 11.30                 | 10.66                 | 10.07                 | 10.79                 | 11.83                 | 10.04                 | 10.39                 | 12.06                 | 10.87                 | 11.34                 |
| $d_E$    | $8.63 \times 10^{-3}$ | $6.93 \times 10^{-3}$ | $7.13 \times 10^{-3}$ | $7.79 \times 10^{-3}$ | $6.57 \times 10^{-3}$ | $8.28 \times 10^{-3}$ | $7.60 \times 10^{-3}$ | $1.23 \times 10^{-2}$ | $4.78 \times 10^{-3}$ | $1.06 \times 10^{-2}$ |
| $\phi^*$ | $1.51 \times 10^{-5}$ | $5.44 \times 10^{-6}$ | $1.17 \times 10^{-4}$ | $3.57 \times 10^{-5}$ | $5.85 \times 10^{-5}$ | $1.98 \times 10^{-4}$ | $1.08 \times 10^{-5}$ | $4.49 \times 10^{-5}$ | $2.83 \times 10^{-5}$ | $5.11 \times 10^{-5}$ |
| $\xi$    | 0.32                  | 0.18                  | 0.54                  | 0.49                  | 0.29                  | 0.43                  | 0.41                  | 0.56                  | 0.33                  | 0.18                  |
