# Supplementary material for: Early exposure to broadly neutralizing antibodies may trigger a dynamical switch from progressive disease to lasting control of SHIV infection
Source: PubMed Central journal article supplement (PMC7462315; doi:10.1371/journal.pcbi.1008064), 2020-08-20
Supplement: pcbi.1008064.s018.pdf [file pcbi.1008064.s018.pdf]

**Table S3** Individual parameter estimates obtained as in Table S1 but with varying effector proliferation rate,  $k_E$  (Methods and Figure S8 for details).

|                 | DFIK                  | MVJ                   | DEWP                   | DFKX                   | DFFX                   | DEWL                   | MAF                    | DEMR                  | DEHW                   | DEBA                   |
|-----------------|-----------------------|-----------------------|------------------------|------------------------|------------------------|------------------------|------------------------|-----------------------|------------------------|------------------------|
| $V(0)$          | $2.33 \times 10^{-3}$ | $6.86 \times 10^{-4}$ | $4.45 \times 10^2$     | $9.24 \times 10^6$     | $4.66 \times 10^{-2}$  | $2.18 \times 10^4$     | $1.05 \times 10^4$     | $5.29 \times 10^0$    | $1.13 \times 10^3$     | $4.18 \times 10^1$     |
| $\omega_1$      | 1.94                  | 2.26                  | 1.38                   | 2.46                   | 1.48                   | 2.12                   | 1.40                   | 1.72                  | 1.57                   | 1.81                   |
| $\omega_2$      | 1.13                  | 1.57                  | 1.45                   | 1.94                   | 1.43                   | 1.72                   | 1.46                   | 1.27                  | 1.52                   | 1.48                   |
| $\eta_1$        | 0.11                  | 0.10                  | 0.04                   | 0.07                   | 0.10                   | 0.08                   | 0.07                   | 0.20                  | 0.07                   | 0.06                   |
| $\eta_2$        | 0.07                  | 0.11                  | 0.05                   | 0.20                   | 0.15                   | 0.09                   | 0.08                   | 0.25                  | 0.08                   | 0.06                   |
| $Vol_1$         | 75.22                 | 151.08                | 445.13                 | 649.98                 | 209.87                 | 1699.25                | 1448.49                | 162.56                | 404.28                 | 297.63                 |
| $Vol_2$         | 760.72                | 1283.45               | 1112.86                | 890.94                 | 625.08                 | 338.39                 | 444.12                 | 766.44                | 876.11                 | 1599.91                |
| $k_1$           | 186.99                | 89.51                 | 263.41                 | 235.32                 | 156.06                 | 190.01                 | 240.82                 | 225.35                | 214.53                 | 354.58                 |
| $k_2$           | 157.59                | 355.60                | 206.67                 | 192.37                 | 107.03                 | 99.75                  | 158.40                 | 517.34                | 383.18                 | 315.02                 |
| $K$             | 46.37                 | 113.75                | 130.45                 | 59.92                  | 54.12                  | 65.22                  | 56.66                  | 96.71                 | 57.23                  | 25.85                  |
| $\beta$         | $2.21 \times 10^{-8}$ | $1.74 \times 10^{-8}$ | $1.79 \times 10^{-8}$  | $1.18 \times 10^{-8}$  | $1.59 \times 10^{-8}$  | $1.26 \times 10^{-8}$  | $1.62 \times 10^{-8}$  | $1.20 \times 10^{-8}$ | $1.41 \times 10^{-8}$  | $1.34 \times 10^{-8}$  |
| $p^*$           | $5.67 \times 10^9$    | $4.15 \times 10^9$    | $3.45 \times 10^9$     | $5.49 \times 10^9$     | $3.90 \times 10^9$     | $5.02 \times 10^9$     | $4.44 \times 10^9$     | $7.15 \times 10^9$    | $5.10 \times 10^9$     | $5.49 \times 10^9$     |
| $m^*$           | 2.81                  | 3.55                  | 11.30                  | 13.16                  | 9.11                   | 4.67                   | 4.46                   | 3.59                  | 4.29                   | 8.82                   |
| $d_E$           | $1.46 \times 10^{-3}$ | $8.67 \times 10^{-3}$ | $1.50 \times 10^{-2}$  | $9.75 \times 10^{-3}$  | $1.83 \times 10^{-2}$  | $1.02 \times 10^{-2}$  | $5.14 \times 10^{-3}$  | $1.17 \times 10^{-2}$ | $1.10 \times 10^{-2}$  | $1.36 \times 10^{-2}$  |
| $k_E$           | 0.34                  | 0.40                  | 0.35                   | 0.44                   | 0.33                   | 0.40                   | 0.37                   | 0.38                  | 0.43                   | 0.32                   |
| $\phi^*$        | $1.02 \times 10^{-4}$ | $1.07 \times 10^{-4}$ | $1.24 \times 10^{-4}$  | $3.16 \times 10^{-4}$  | $1.17 \times 10^{-4}$  | $1.34 \times 10^{-4}$  | $2.33 \times 10^{-4}$  | $8.76 \times 10^{-5}$ | $2.75 \times 10^{-4}$  | $1.45 \times 10^{-4}$  |
| $\xi$           | 1.22                  | 0.49                  | 0.82                   | 1.24                   | 1.13                   | 0.93                   | 0.51                   | 1.24                  | 0.51                   | 0.44                   |
| $f^*$           | $5.88 \times 10^{-8}$ | $3.18 \times 10^{-9}$ | $6.96 \times 10^{-11}$ | $3.82 \times 10^{-12}$ | $7.21 \times 10^{-10}$ | $8.38 \times 10^{-11}$ | $1.48 \times 10^{-11}$ | $7.71 \times 10^{-9}$ | $1.65 \times 10^{-12}$ | $2.63 \times 10^{-11}$ |
| $\zeta_\alpha$  | 0.57                  | 0.94                  | 0.95                   | NA                     | NA                     | 0.85                   | 0.89                   | 0.39                  | NA                     | NA                     |
| $\zeta_\beta$   | NA                    | 0.76                  | NA                     | NA                     | NA                     | 0.75                   | NA                     | 0.57                  | NA                     | NA                     |
| $\theta_m$      | 2.75                  | 10.87                 | 20.16                  | NA                     | NA                     | 14.37                  | 10.75                  | 5.38                  | NA                     | NA                     |
| $\theta_\alpha$ | 330.76                | 432.62                | 429.95                 | NA                     | NA                     | 916.98                 | 915.27                 | 609.98                | NA                     | NA                     |
| $\theta_\beta$  | NA                    | 943.54                | NA                     | NA                     | NA                     | 1077.44                | NA                     | 942.11                | NA                     | NA                     |
