# Supplementary material for: Early exposure to broadly neutralizing antibodies may trigger a dynamical switch from progressive disease to lasting control of SHIV infection
Source: PubMed Central journal article supplement (PMC7462315; doi:10.1371/journal.pcbi.1008064), 2020-08-20
Supplement: pcbi.1008064.s019.pdf [file pcbi.1008064.s019.pdf]

**Table S4** Individual parameter estimates obtained by fitting a basic viral dynamics model without an explicit effector response (Eqs. 25-28; Methods and Figure S9 for details). Here,  $d_L$  was fixed at 0.004 day<sup>-1</sup>.

|            | DFIK                   | MVJ                    | DEWP                   | DFKX                   | DFFX                   | DEWL                  | MAF                   | DEMR                  | DEHW                  | DEBA                  |
|------------|------------------------|------------------------|------------------------|------------------------|------------------------|-----------------------|-----------------------|-----------------------|-----------------------|-----------------------|
| $V(0)$     | $1.36 \times 10^{-1}$  | $4.75 \times 10^0$     | $2.68 \times 10^7$     | $3.22 \times 10^8$     | $8.40 \times 10^6$     | $3.44 \times 10^7$    | $5.11 \times 10^7$    | $7.17 \times 10^9$    | $4.77 \times 10^7$    | $7.89 \times 10^7$    |
| $\omega_1$ | 2.03                   | 2.23                   | 1.63                   | 2.11                   | 2.06                   | 1.88                  | 1.76                  | 2.54                  | 1.52                  | 2.02                  |
| $\omega_2$ | 1.50                   | 1.12                   | 1.02                   | 1.69                   | 1.36                   | 2.47                  | 1.24                  | 1.49                  | 1.04                  | 1.20                  |
| $\eta_1$   | 0.12                   | 0.11                   | 0.04                   | 0.07                   | 0.10                   | 0.09                  | 0.07                  | 0.21                  | 0.07                  | 0.06                  |
| $\eta_2$   | 0.08                   | 0.08                   | 0.05                   | 0.24                   | 0.19                   | 0.10                  | 0.06                  | 0.20                  | 0.07                  | 0.08                  |
| $Vol_1$    | 77.57                  | 119.51                 | 411.73                 | 666.02                 | 199.69                 | 1154.70               | 1231.05               | 126.27                | 402.65                | 179.70                |
| $Vol_2$    | 600.62                 | 1425.75                | 977.06                 | 534.87                 | 435.31                 | 354.16                | 535.88                | 541.10                | 1119.65               | 1328.18               |
| $k_1$      | $5.18 \times 10^3$     | $9.52 \times 10^{-1}$  | $5.97 \times 10^{-3}$  | $5.32 \times 10^2$     | $6.42 \times 10^1$     | $7.74 \times 10^2$    | $6.67 \times 10^1$    | $7.47 \times 10^0$    | $3.33 \times 10^4$    | $6.63 \times 10^{-1}$ |
| $k_2$      | $9.25 \times 10^3$     | $1.15 \times 10^2$     | $1.40 \times 10^5$     | $1.15 \times 10^8$     | $1.71 \times 10^4$     | $5.74 \times 10^5$    | $2.01 \times 10^{13}$ | $7.38 \times 10^8$    | $6.97 \times 10^4$    | $3.90 \times 10^5$    |
| $K$        | $8.27 \times 10^{-12}$ | $1.00 \times 10^{-35}$ | $6.06 \times 10^{-52}$ | $3.67 \times 10^{-27}$ | $6.84 \times 10^{-38}$ | $1.68 \times 10^5$    | $8.43 \times 10^{12}$ | $4.04 \times 10^5$    | $2.17 \times 10^3$    | $2.35 \times 10^2$    |
| $\beta$    | $1.18 \times 10^{-8}$  | $9.84 \times 10^{-9}$  | $1.04 \times 10^{-8}$  | $2.46 \times 10^{-8}$  | $9.56 \times 10^{-9}$  | $6.06 \times 10^{-9}$ | $4.56 \times 10^{-9}$ | $5.39 \times 10^{-9}$ | $5.78 \times 10^{-9}$ | $3.62 \times 10^{-9}$ |
| $p^*$      | $4.78 \times 10^9$     | $3.67 \times 10^9$     | $2.08 \times 10^9$     | $4.80 \times 10^9$     | $5.47 \times 10^9$     | $2.94 \times 10^9$    | $3.59 \times 10^9$    | $2.27 \times 10^9$    | $3.26 \times 10^9$    | $5.12 \times 10^9$    |
| $f_L$      | $1.29 \times 10^{-1}$  | $6.37 \times 10^{-2}$  | $3.12 \times 10^{-1}$  | $1.24 \times 10^{-1}$  | $3.09 \times 10^{-1}$  | $5.33 \times 10^{-2}$ | $3.98 \times 10^{-2}$ | $6.18 \times 10^{-2}$ | $2.20 \times 10^{-1}$ | $1.04 \times 10^{-1}$ |
| $\psi$     | $2.87 \times 10^{-4}$  | $2.39 \times 10^{-4}$  | $2.32 \times 10^{-4}$  | $2.85 \times 10^{-4}$  | $3.35 \times 10^{-4}$  | $2.95 \times 10^{-4}$ | $6.02 \times 10^{-5}$ | $1.83 \times 10^{-3}$ | $3.61 \times 10^{-4}$ | $8.09 \times 10^{-5}$ |
| $a$        | $1.48 \times 10^{-2}$  | $4.68 \times 10^{-3}$  | $9.90 \times 10^{-3}$  | $3.02 \times 10^{-3}$  | $3.69 \times 10^{-3}$  | $1.21 \times 10^{-2}$ | $3.35 \times 10^{-3}$ | $3.34 \times 10^{-2}$ | $9.75 \times 10^{-3}$ | $3.89 \times 10^{-3}$ |
