# Supplementary material for: Early exposure to broadly neutralizing antibodies may trigger a dynamical switch from progressive disease to lasting control of SHIV infection
Source: PubMed Central journal article supplement (PMC7462315; doi:10.1371/journal.pcbi.1008064), 2020-08-20
Supplement: pcbi.1008064.s021.pdf [file pcbi.1008064.s021.pdf]

**Table S6** Individual parameter estimates as obtained in Table S1 but with the Hill coefficient  $n = 3$  (Methods and Figure S11 for details).

|                 | DFIK                  | MVJ                   | DEWP                  | DFKX                  | DFFX                  | DEWL                  | MAF                   | DEMR                   | DEHW                   | DEBA                  |
|-----------------|-----------------------|-----------------------|-----------------------|-----------------------|-----------------------|-----------------------|-----------------------|------------------------|------------------------|-----------------------|
| $V(0)$          | $6.34 \times 10^0$    | $1.33 \times 10^{-1}$ | $3.53 \times 10^2$    | $9.87 \times 10^2$    | $1.00 \times 10^3$    | $9.28 \times 10^2$    | $9.99 \times 10^2$    | $9.99 \times 10^2$     | $1.00 \times 10^3$     | $9.53 \times 10^2$    |
| $\omega_1$      | 1.78                  | 1.27                  | 1.58                  | 1.32                  | 1.89                  | 1.30                  | 1.80                  | 1.85                   | 1.59                   | 1.72                  |
| $\omega_2$      | 1.78                  | 1.81                  | 1.77                  | 1.88                  | 1.96                  | 1.75                  | 2.31                  | 1.90                   | 2.44                   | 1.97                  |
| $\eta_1$        | 0.12                  | 0.13                  | 0.04                  | 0.07                  | 0.10                  | 0.08                  | 0.06                  | 0.21                   | 0.07                   | 0.06                  |
| $\eta_2$        | 0.08                  | 0.15                  | 0.05                  | 0.18                  | 0.17                  | 0.09                  | 0.07                  | 0.14                   | 0.07                   | 0.07                  |
| $Vol_1$         | 80.20                 | 80.30                 | 548.87                | 608.11                | 167.20                | 1630.38               | 2194.97               | 117.92                 | 387.75                 | 243.09                |
| $Vol_2$         | 601.75                | 1470.23               | 1037.82               | 866.97                | 564.90                | 369.15                | 477.42                | 832.63                 | 1222.64                | 1501.78               |
| $k_1$           | 54.91                 | 33.41                 | 21.63                 | 75.68                 | 24.69                 | 47.39                 | 46.89                 | 59.66                  | 50.04                  | 58.85                 |
| $k_2$           | 87.54                 | 377.98                | 162.26                | 177.43                | 1349.73               | 377.25                | 64.73                 | 512.79                 | 303.04                 | 505.15                |
| $K$             | 3067.59               | 104.77                | 570.35                | 158.55                | 488.02                | 1468.32               | 28.57                 | 453.75                 | 141.67                 | 56.91                 |
| $\beta$         | $6.53 \times 10^{-9}$ | $1.13 \times 10^{-8}$ | $4.68 \times 10^{-9}$ | $1.11 \times 10^{-8}$ | $6.45 \times 10^{-9}$ | $1.47 \times 10^{-8}$ | $5.38 \times 10^{-9}$ | $1.44 \times 10^{-8}$  | $1.47 \times 10^{-8}$  | $8.28 \times 10^{-9}$ |
| $p^*$           | $5.20 \times 10^9$    | $4.15 \times 10^9$    | $6.82 \times 10^9$    | $4.52 \times 10^9$    | $5.79 \times 10^9$    | $4.45 \times 10^9$    | $8.52 \times 10^9$    | $8.91 \times 10^9$     | $4.32 \times 10^9$     | $5.61 \times 10^9$    |
| $m^*$           | 16.26                 | 15.01                 | 28.81                 | 17.39                 | 25.29                 | 17.42                 | 13.23                 | 36.92                  | 13.29                  | 29.18                 |
| $d_E$           | $1.06 \times 10^{-3}$ | $1.97 \times 10^{-3}$ | $2.74 \times 10^{-3}$ | $8.47 \times 10^{-3}$ | $7.99 \times 10^{-3}$ | $5.30 \times 10^{-3}$ | $1.44 \times 10^{-3}$ | $1.64 \times 10^{-2}$  | $9.84 \times 10^{-3}$  | $8.79 \times 10^{-3}$ |
| $\phi^*$        | $2.65 \times 10^{-5}$ | $5.78 \times 10^{-5}$ | $7.59 \times 10^{-5}$ | $1.96 \times 10^{-4}$ | $1.97 \times 10^{-4}$ | $7.21 \times 10^{-5}$ | $1.05 \times 10^{-4}$ | $5.06 \times 10^{-5}$  | $2.58 \times 10^{-4}$  | $3.29 \times 10^{-4}$ |
| $\xi$           | 1.08                  | 0.21                  | 3.92                  | 1.28                  | 1.64                  | 0.26                  | 0.26                  | 0.52                   | 0.24                   | 1.51                  |
| $f^*$           | $5.28 \times 10^{-7}$ | $3.22 \times 10^{-8}$ | $3.67 \times 10^{-8}$ | $6.85 \times 10^{-9}$ | $5.92 \times 10^{-9}$ | $1.17 \times 10^{-9}$ | $3.69 \times 10^{-9}$ | $3.29 \times 10^{-10}$ | $9.08 \times 10^{-10}$ | $9.36 \times 10^{-9}$ |
| $\zeta_\alpha$  | 0.99                  | 0.00                  | 0.38                  | NA                    | NA                    | 1.00                  | 0.00                  | 1.00                   | NA                     | NA                    |
| $\zeta_\beta$   | NA                    | 0.67                  | NA                    | NA                    | NA                    | 0.44                  | NA                    | 0.34                   | NA                     | NA                    |
| $\theta_m$      | 30.00                 | 23.16                 | 25.06                 | NA                    | NA                    | 10.74                 | 8.36                  | 13.69                  | NA                     | NA                    |
| $\theta_\alpha$ | 326.00                | 425.05                | 424.00                | NA                    | NA                    | 916.51                | 913.15                | 613.24                 | NA                     | NA                    |
| $\theta_\beta$  | NA                    | 936.50                | NA                    | NA                    | NA                    | 1074.76               | NA                    | 947.50                 | NA                     | NA                    |
