# Supplementary material for: Early exposure to broadly neutralizing antibodies may trigger a dynamical switch from progressive disease to lasting control of SHIV infection
Source: PubMed Central journal article supplement (PMC7462315; doi:10.1371/journal.pcbi.1008064), 2020-08-20
Supplement: pcbi.1008064.s022.pdf [file pcbi.1008064.s022.pdf]

**Table S7** Individual parameter estimates as obtained in Table S1 but with the Hill coefficient  $n = 1$  (Methods and Figure S12 for details).

|            | DFIK                  | MVJ                   | DEWP                  | DFKX                  | DFFX                  | DEWL                   | MAF                    | DEMR                  | DEHW                   | DEBA                  |
|------------|-----------------------|-----------------------|-----------------------|-----------------------|-----------------------|------------------------|------------------------|-----------------------|------------------------|-----------------------|
| $V(0)$     | $7.84 \times 10^{-3}$ | $9.42 \times 10^{-3}$ | $1.58 \times 10^3$    | $2.67 \times 10^{-1}$ | $1.42 \times 10^{-1}$ | $4.67 \times 10^4$     | $1.68 \times 10^5$     | $7.01 \times 10^2$    | $3.99 \times 10^3$     | $3.00 \times 10^0$    |
| $\omega_1$ | 1.31                  | 2.21                  | 0.97                  | 2.00                  | 1.54                  | 1.43                   | 0.85                   | 1.61                  | 2.27                   | 1.61                  |
| $\omega_2$ | 0.89                  | 1.67                  | 1.04                  | 2.43                  | 2.32                  | 1.58                   | 1.08                   | 2.05                  | 1.48                   | 1.43                  |
| $\eta_1$   | 0.12                  | 0.10                  | 0.04                  | 0.06                  | 0.10                  | 0.07                   | 0.07                   | 0.28                  | 0.07                   | 0.06                  |
| $\eta_2$   | 0.07                  | 0.25                  | 0.05                  | 0.25                  | 0.14                  | 0.09                   | 0.07                   | 0.27                  | 0.07                   | 0.06                  |
| $Vol_1$    | 64.72                 | 138.60                | 502.26                | 627.41                | 136.64                | 1783.29                | 1487.30                | 47.12                 | 400.49                 | 247.16                |
| $Vol_2$    | 641.78                | 834.52                | 1088.40               | 683.72                | 637.74                | 317.29                 | 555.65                 | 479.13                | 1036.00                | 1444.39               |
| $k_1$      | 0.81                  | 0.02                  | 0.35                  | 0.70                  | 0.28                  | 2.92                   | 0.30                   | 0.29                  | 0.47                   | 0.13                  |
| $k_2$      | 56.94                 | 3027.28               | 4.21                  | 138.79                | 55.87                 | 39.10                  | 50.87                  | 65.15                 | 41766.23               | 1047.63               |
| $K$        | $1.85 \times 10^{-5}$ | $6.07 \times 10^{-8}$ | $2.29 \times 10^{-3}$ | $7.54 \times 10^{-4}$ | 0.04                  | 162.74                 | 153.32                 | 35.28                 | 2364.55                | 36.66                 |
| $\beta$    | $8.72 \times 10^{-9}$ | $8.46 \times 10^{-9}$ | $7.23 \times 10^{-9}$ | $9.60 \times 10^{-9}$ | $6.89 \times 10^{-9}$ | $1.80 \times 10^{-8}$  | $7.61 \times 10^{-9}$  | $5.39 \times 10^{-9}$ | $3.10 \times 10^{-8}$  | $6.00 \times 10^{-9}$ |
| $p^*$      | $4.65 \times 10^9$    | $6.94 \times 10^9$    | $3.13 \times 10^9$    | $3.04 \times 10^9$    | $4.26 \times 10^9$    | $3.44 \times 10^9$     | $5.88 \times 10^9$     | $5.20 \times 10^9$    | $2.74 \times 10^9$     | $8.55 \times 10^9$    |
| $m^*$      | 2.73                  | 41.58                 | 1.81                  | 2.71                  | 6.78                  | 483.58                 | 5180.91                | 26.52                 | 9.59                   | 0.30                  |
| $d_E$      | $3.82 \times 10^{-2}$ | $7.74 \times 10^{-4}$ | $2.33 \times 10^{-2}$ | $4.21 \times 10^{-1}$ | $3.51 \times 10^{-3}$ | $8.25 \times 10^{-4}$  | $2.81 \times 10^{-4}$  | $1.63 \times 10^{-5}$ | $2.99 \times 10^{-5}$  | $6.49 \times 10^{-4}$ |
| $\phi^*$   | $3.11 \times 10^{-3}$ | $1.62 \times 10^{-3}$ | $3.06 \times 10^{-3}$ | $1.44 \times 10^{-4}$ | $6.59 \times 10^{-5}$ | $5.81 \times 10^{-4}$  | $6.29 \times 10^{-3}$  | $3.72 \times 10^{-3}$ | $1.01 \times 10^{-4}$  | $2.34 \times 10^{-5}$ |
| $\xi$      | 0.65                  | 0.32                  | 0.02                  | 0.17                  | 0.09                  | 0.19                   | 0.80                   | 0.04                  | 0.06                   | 0.07                  |
| $f^*$      | $1.93 \times 10^{-4}$ | $2.12 \times 10^{-5}$ | $1.38 \times 10^{-5}$ | $2.67 \times 10^{-9}$ | $4.15 \times 10^{-9}$ | $3.50 \times 10^{-13}$ | $1.24 \times 10^{-10}$ | $8.23 \times 10^{-6}$ | $1.92 \times 10^{-11}$ | $7.18 \times 10^{-8}$ |
