# Supplementary material for: Early exposure to broadly neutralizing antibodies may trigger a dynamical switch from progressive disease to lasting control of SHIV infection
Source: PubMed Central journal article supplement (PMC7462315; doi:10.1371/journal.pcbi.1008064), 2020-08-20
Supplement: pcbi.1008064.s023.pdf [file pcbi.1008064.s023.pdf]

**Table S8** Individual parameter estimates for treated macaques obtained by simultaneously fitting models without enhanced antigen clearance by bNAbs (no  $AV$  term in Eq. 15) to  $V$ ,  $A_1$  and  $A_2$  across both untreated macaques and responders (Methods and Figure S13 for details).

|            | DFIK                   | MVJ                   | DEWP                  | DFKX                  | DFFX                  | DEWL                   | MAF                   | DEMR                  | DEHW                  | DEBA                  |
|------------|------------------------|-----------------------|-----------------------|-----------------------|-----------------------|------------------------|-----------------------|-----------------------|-----------------------|-----------------------|
| $V(0)$     | $4.42 \times 10^0$     | $4.52 \times 10^{-5}$ | $6.20 \times 10^{-1}$ | $6.81 \times 10^3$    | $4.39 \times 10^{-3}$ | $1.72 \times 10^6$     | $2.35 \times 10^5$    | $8.76 \times 10^4$    | $3.48 \times 10^3$    | $1.53 \times 10^{-3}$ |
| $\omega_1$ | 2.33                   | 1.71                  | 2.54                  | 2.16                  | 2.02                  | 2.57                   | 2.09                  | 1.51                  | 2.33                  | 1.78                  |
| $\omega_2$ | 1.46                   | 1.26                  | 1.17                  | 1.05                  | 1.09                  | 1.17                   | 1.35                  | 0.99                  | 1.12                  | 1.20                  |
| $\eta_1$   | 0.11                   | 0.12                  | 0.04                  | 0.07                  | 0.11                  | 0.07                   | 0.07                  | 0.24                  | 0.07                  | 0.06                  |
| $\eta_2$   | 0.07                   | 0.26                  | 0.04                  | 0.23                  | 0.23                  | 0.09                   | 0.08                  | 0.18                  | 0.07                  | 0.06                  |
| $Vol_1$    | 90.40                  | 90.56                 | 458.29                | 686.27                | 128.48                | 2668.51                | 1590.33               | 76.79                 | 433.49                | 252.96                |
| $Vol_2$    | 854.29                 | 818.14                | 1006.27               | 736.39                | 265.97                | 372.44                 | 441.28                | 529.42                | 1011.31               | 1349.65               |
| $k_1$      | $5.27 \times 10^{-10}$ | 6.41E-18              | $2.91 \times 10^{-2}$ | $5.29 \times 10^{-5}$ | $2.94 \times 10^{-5}$ | $5.58 \times 10^{-12}$ | $3.90 \times 10^{-5}$ | $1.48 \times 10^{-9}$ | $8.12 \times 10^{-9}$ | $1.02 \times 10^1$    |
| $k_2$      | 68.47                  | 34.20                 | 88.56                 | 13.95                 | 106.02                | 30.71                  | 34.26                 | 13.37                 | 57.79                 | 54.87                 |
| $K$        | 36852.02               | 382.85                | 5047.78               | 546.43                | 984.93                | 22845.91               | 58520.72              | 1116.77               | 5159.19               | 517.12                |
| $\beta$    | $1.29 \times 10^{-8}$  | $1.69 \times 10^{-8}$ | $6.28 \times 10^{-9}$ | $1.37 \times 10^{-8}$ | $1.44 \times 10^{-8}$ | $6.06 \times 10^{-9}$  | $9.95 \times 10^{-9}$ | $3.28 \times 10^{-8}$ | $8.94 \times 10^{-9}$ | $7.55 \times 10^{-9}$ |
| $p^*$      | $2.39 \times 10^9$     | $2.08 \times 10^9$    | $6.23 \times 10^9$    | $3.99 \times 10^9$    | $8.34 \times 10^9$    | $5.64 \times 10^9$     | $2.98 \times 10^9$    | $1.49 \times 10^{10}$ | $3.89 \times 10^9$    | $4.82 \times 10^9$    |
| $m^*$      | 13.17                  | 1.56                  | 12.47                 | 18.64                 | 34.81                 | 8.61                   | 5.18                  | 310.52                | 6.22                  | 12.38                 |
| $d_E$      | $5.29 \times 10^{-3}$  | $6.33 \times 10^{-3}$ | $1.61 \times 10^{-2}$ | $3.78 \times 10^{-2}$ | $3.50 \times 10^{-2}$ | $5.31 \times 10^{-2}$  | $4.81 \times 10^{-2}$ | $8.96 \times 10^{-4}$ | $3.05 \times 10^{-2}$ | $1.66 \times 10^{-2}$ |
| $\phi^*$   | $6.41 \times 10^{-6}$  | $1.52 \times 10^{-6}$ | $7.74 \times 10^{-6}$ | $1.41 \times 10^{-4}$ | $3.65 \times 10^{-5}$ | $1.91 \times 10^{-4}$  | $2.50 \times 10^{-5}$ | $5.36 \times 10^{-5}$ | $1.28 \times 10^{-4}$ | $3.38 \times 10^{-4}$ |
| $\xi$      | 6.14                   | 0.10                  | 7.91                  | 10.32                 | 3.80                  | 9.74                   | 4.92                  | 0.30                  | 5.46                  | 28.05                 |
| $f^*$      | $5.88 \times 10^{-6}$  | $1.42 \times 10^{-6}$ | $2.95 \times 10^{-7}$ | $2.37 \times 10^{-7}$ | $8.33 \times 10^{-6}$ | $8.14 \times 10^{-7}$  | $1.24 \times 10^{-6}$ | $7.19 \times 10^{-7}$ | $2.22 \times 10^{-7}$ | $3.35 \times 10^{-7}$ |
