# Supplementary material for: Early exposure to broadly neutralizing antibodies may trigger a dynamical switch from progressive disease to lasting control of SHIV infection
Source: PubMed Central journal article supplement (PMC7462315; doi:10.1371/journal.pcbi.1008064), 2020-08-20
Supplement: pcbi.1008064.s024.pdf [file pcbi.1008064.s024.pdf]

**Table S9** Individual parameter estimates for treated macaques obtained by simultaneously fitting models without enhanced antigen uptake and subsequent effector elicitation by bNAbs (no  $f^*AV$  term in Eq. 16) to  $V$ ,  $A_1$  and  $A_2$  across both untreated macaques and responders (Methods and Figure S14 for details).

|            | DFIK                  | MVJ                   | DEWP                  | DFKX                  | DFFX                  | DEWL                  | MAF                   | DEMR                  | DEHW                  | DEBA                  |
|------------|-----------------------|-----------------------|-----------------------|-----------------------|-----------------------|-----------------------|-----------------------|-----------------------|-----------------------|-----------------------|
| $V(0)$     | $1.07 \times 10^1$    | $5.51 \times 10^{-3}$ | $1.12 \times 10^5$    | $1.29 \times 10^4$    | $5.09 \times 10^1$    | $8.05 \times 10^4$    | $1.99 \times 10^4$    | $1.36 \times 10^2$    | $6.62 \times 10^3$    | $3.30 \times 10^1$    |
| $\omega_1$ | 1.57                  | 1.53                  | 1.18                  | 1.43                  | 1.54                  | 1.51                  | 1.46                  | 1.36                  | 1.30                  | 1.40                  |
| $\omega_2$ | 2.25                  | 1.79                  | 1.48                  | 1.75                  | 2.11                  | 1.95                  | 2.04                  | 1.29                  | 2.00                  | 1.86                  |
| $\eta_1$   | 0.12                  | 0.11                  | 0.04                  | 0.08                  | 0.10                  | 0.08                  | 0.08                  | 0.22                  | 0.07                  | 0.06                  |
| $\eta_2$   | 0.07                  | 0.11                  | 0.05                  | 0.19                  | 0.19                  | 0.10                  | 0.08                  | 0.17                  | 0.08                  | 0.05                  |
| $Vol_1$    | 62.50                 | 114.80                | 445.53                | 484.85                | 192.72                | 2002.30               | 1616.27               | 111.04                | 307.54                | 237.20                |
| $Vol_2$    | 734.61                | 1366.46               | 903.80                | 911.61                | 477.84                | 295.37                | 467.38                | 773.07                | 893.40                | 1902.33               |
| $k_1$      | 64.61                 | 49.97                 | 49.66                 | 67.34                 | 47.38                 | 54.47                 | 39.34                 | 55.81                 | 93.15                 | 37.50                 |
| $k_2$      | 190.11                | 401.45                | 88.00                 | 122.42                | 114.03                | 96.48                 | 51.62                 | 160.31                | 97.58                 | 208.22                |
| $K$        | 97.45                 | 47.13                 | 28.06                 | 27.34                 | 48.03                 | 237.89                | 84.13                 | 54.24                 | 70.78                 | 124.71                |
| $\beta$    | $1.01 \times 10^{-8}$ | $8.88 \times 10^{-9}$ | $6.78 \times 10^{-9}$ | $7.37 \times 10^{-9}$ | $6.01 \times 10^{-9}$ | $4.61 \times 10^{-9}$ | $6.80 \times 10^{-9}$ | $6.76 \times 10^{-9}$ | $7.69 \times 10^{-9}$ | $3.05 \times 10^{-9}$ |
| $p^*$      | $5.41 \times 10^9$    | $7.30 \times 10^9$    | $7.20 \times 10^9$    | $1.04 \times 10^{10}$ | $6.21 \times 10^9$    | $1.08 \times 10^{10}$ | $4.27 \times 10^9$    | $6.97 \times 10^9$    | $8.75 \times 10^9$    | $9.68 \times 10^9$    |
| $m^*$      | 9.92                  | 14.93                 | 11.91                 | 12.83                 | 11.64                 | 11.44                 | 7.33                  | 8.40                  | 11.58                 | 7.97                  |
| $d_E$      | $2.48 \times 10^{-2}$ | $1.06 \times 10^{-2}$ | $1.23 \times 10^{-2}$ | $2.20 \times 10^{-2}$ | $8.60 \times 10^{-3}$ | $7.85 \times 10^{-3}$ | $4.23 \times 10^{-3}$ | $5.72 \times 10^{-3}$ | $1.20 \times 10^{-2}$ | $8.58 \times 10^{-3}$ |
| $\phi^*$   | $6.86 \times 10^{-7}$ | $7.79 \times 10^{-6}$ | $1.71 \times 10^{-5}$ | $5.85 \times 10^{-5}$ | $6.23 \times 10^{-5}$ | $4.38 \times 10^{-5}$ | $1.51 \times 10^{-4}$ | $9.75 \times 10^{-6}$ | $8.08 \times 10^{-5}$ | $1.84 \times 10^{-4}$ |
| $\xi$      | 0.58                  | 0.27                  | 0.52                  | 0.34                  | 0.51                  | 0.32                  | 0.33                  | 0.14                  | 0.20                  | 1.04                  |
