# Supplementary material for: Early exposure to broadly neutralizing antibodies may trigger a dynamical switch from progressive disease to lasting control of SHIV infection
Source: PubMed Central journal article supplement (PMC7462315; doi:10.1371/journal.pcbi.1008064), 2020-08-20
Supplement: pcbi.1008064.s025.pdf [file pcbi.1008064.s025.pdf]

**Table S10** Summary table of macaques from Nishimura *et al.* which were subjected to early bNAb therapy, with Macaque ID, initial viral inoculum, route of administration, whether anti-CD8 $\alpha$  Ab- and anti-CD8 $\beta$  Ab-mediated effector depletion was performed, and whether these macaques regained viremic control subsequently. Macaques to which only anti-CD8 $\alpha$  Abs, or both anti-CD8 $\alpha$  and anti-CD8 $\beta$  Abs were administered, have their IDs colored blue and purple, respectively. Non-controller macaque IDs are colored orange and their data was not considered for fitting.

| Macaque ID | Viral inoculum (TCID <sub>50</sub> ) | Route of administration | Controller | Anti-CD8 $\alpha$ Abs | Anti-CD8 $\beta$ Abs | Regained control |
|------------|--------------------------------------|-------------------------|------------|-----------------------|----------------------|------------------|
| DEMR       | 100                                  | Intravenous             | Yes        | Yes                   | Yes                  | Yes              |
| MVJ        | 1000                                 | Intrarectal             | Yes        | Yes                   | Yes                  | Yes              |
| DEWP       | 1000                                 | Intrarectal             | Yes        | Yes                   | —                    | Yes              |
| DEWL       | 1000                                 | Intravenous             | Yes        | Yes                   | Yes                  | Yes              |
| MAF        | 1000                                 | Intravenous             | Yes        | Yes                   | —                    | Yes              |
| DFIK       | 1000                                 | Intrarectal             | Yes        | Yes                   | —                    | No               |
| DFKX       | 1000                                 | Intrarectal             | Yes        | —                     | —                    | —                |
| DFFX       | 1000                                 | Intrarectal             | Yes        | —                     | —                    | —                |
| DEHW       | 100                                  | Intravenous             | Yes        | —                     | —                    | —                |
| DEBA       | 100                                  | Intravenous             | Yes        | —                     | —                    | —                |
| DEPH       | 1000                                 | Intrarectal             | No         | —                     | —                    | —                |
| DF06       | 1000                                 | Intravenous             | No (AIDS)  | —                     | —                    | —                |
| DELV       | 1000                                 | Intravenous             | No         | —                     | —                    | —                |
